# Supplementary material
Source: MDPI journal article supplement (https://www.mdpi.com/2297-8739/10/11/567)
Supplement: s1 [file s1]

Table S1. Summary of system suitability parameters for HPLC analysis 10 flavonoids with different flow rates (0.8, 1.0, and 1.2 mL/min).

| Compounds     | 0.8 mL/min            |           |                   | 1.0 mL/min |           |             | 1.2 mL/min |           |             |
|---------------|-----------------------|-----------|-------------------|------------|-----------|-------------|------------|-----------|-------------|
|               | <sup>a</sup> RT (min) | Asymmetry | Resolutions       | RT (min)   | Asymmetry | Resolutions | RT (min)   | Asymmetry | Resolutions |
| Rutin         | 3.10                  | 1.08      | 15.02             | 3.98       | 0.87      | 12.99       | 3.37       | 0.85      | 11.81       |
| Narirutin     | 4.88                  | 0.89      | 15.36             | 6.41       | 0.86      | 4.68        | 5.44       | 0.83      | 4.11        |
| Naringin      | 7.85                  | 0.89      | 5.04              | 7.52       | 0.82      | 3.53        | 6.43       | 0.80      | 3.24        |
| Hesperidin    | 8.97                  | 0.88      | 4.02              | 8.33       | 0.85      | 4.54        | 7.25       | 0.80      | 4.24        |
| Neohesperidin | 9.77                  | 0.92      | 5.03              | 9.27       | 0.84      | 22.33       | 8.22       | 0.80      | 19.25       |
| Quercetin     | 10.68                 | 0.89      | 26.68             | 14.44      | 0.92      | 11.85       | 13.25      | 0.87      | 9.83        |
| Naringenin    | 16.04                 | 0.97      | 14.78             | 17.69      | 0.85      | 5.04        | 16.38      | 0.81      | 4.17        |
| Hesperetin    | 19.44                 | 0.88      | 5.63              | 19.02      | 0.84      | 24.02       | 17.71      | 0.80      | 21.53       |
| Nobiletin     | 20.61                 | 0.90      | 27.47             | 23.64      | 0.85      | 11.83       | 22.64      | 0.82      | 11.07       |
| Tangeretin    | 24.99                 | 0.92      | <sup>b</sup> n.a. | 25.33      | 0.87      | n.a.        | 24.31      | 0.82      | n.a.        |

<sup>a</sup>RT, retention time

<sup>b</sup>n.a., not analyzed

Table S2. Summary of system suitability parameters for HPLC analysis 10 flavonoids with different column temperatures (30, 35, 40, and 45 °C).

| Compounds     | 30 °C                 |           |                   | 35 °C    |           |             | 40 °C    |           |             | 45 °C    |           |             |
|---------------|-----------------------|-----------|-------------------|----------|-----------|-------------|----------|-----------|-------------|----------|-----------|-------------|
|               | <sup>a</sup> RT (min) | Asymmetry | Resolutions       | RT (min) | Asymmetry | Resolutions | RT (min) | Asymmetry | Resolutions | RT (min) | Asymmetry | Resolutions |
| Rutin         | 5.53                  | 0.98      | 18.02             | 5.17     | 0.94      | 16.79       | 4.87     | 0.89      | 15.16       | 4.60     | 0.86      | 14.12       |
| Narirutin     | 8.80                  | 0.92      | 5.69              | 8.31     | 0.90      | 5.36        | 7.83     | 0.89      | 4.97        | 7.37     | 0.87      | 4.81        |
| Naringin      | 9.84                  | 0.86      | 3.37              | 9.38     | 0.86      | 3.76        | 8.95     | 0.87      | 3.96        | 8.51     | 0.84      | 4.19        |
| Hesperidin    | 10.41                 | 0.96      | 5.55              | 10.07    | 0.92      | 5.34        | 9.75     | 0.92      | 5.01        | 9.43     | 0.85      | 4.73        |
| Neohesperidin | 11.30                 | 0.92      | 35.63             | 10.98    | 0.90      | 31.22       | 10.67    | 0.88      | 26.53       | 10.37    | 0.85      | 21.46       |
| Quercetin     | 17.34                 | 1.00      | 19.02             | 16.66    | 0.96      | 17.31       | 16.03    | 0.95      | 14.63       | 15.43    | 1.00      | 11.57       |
| Naringenin    | 20.62                 | 0.95      | 5.45              | 20.04    | 0.89      | 5.69        | 19.43    | 0.89      | 5.62        | 18.79    | 0.87      | 5.17        |
| Hesperetin    | 21.43                 | 0.76      | 27.99             | 21.01    | 0.90      | 28.33       | 20.59    | 0.88      | 27.52       | 20.17    | 0.86      | 24.56       |
| Nobiletin     | 25.20                 | 0.95      | 13.62             | 25.09    | 0.93      | 12.97       | 24.99    | 0.90      | 12.23       | 24.88    | 0.87      | 10.93       |
| Tangeretin    | 27.00                 | 0.96      | <sup>b</sup> n.a. | 26.84    | 0.92      | n.a.        | 26.69    | 0.92      | n.a.        | 26.54    | 0.89      | n.a.        |

<sup>a</sup>RT, retention time

<sup>b</sup>n.a., not analyzed

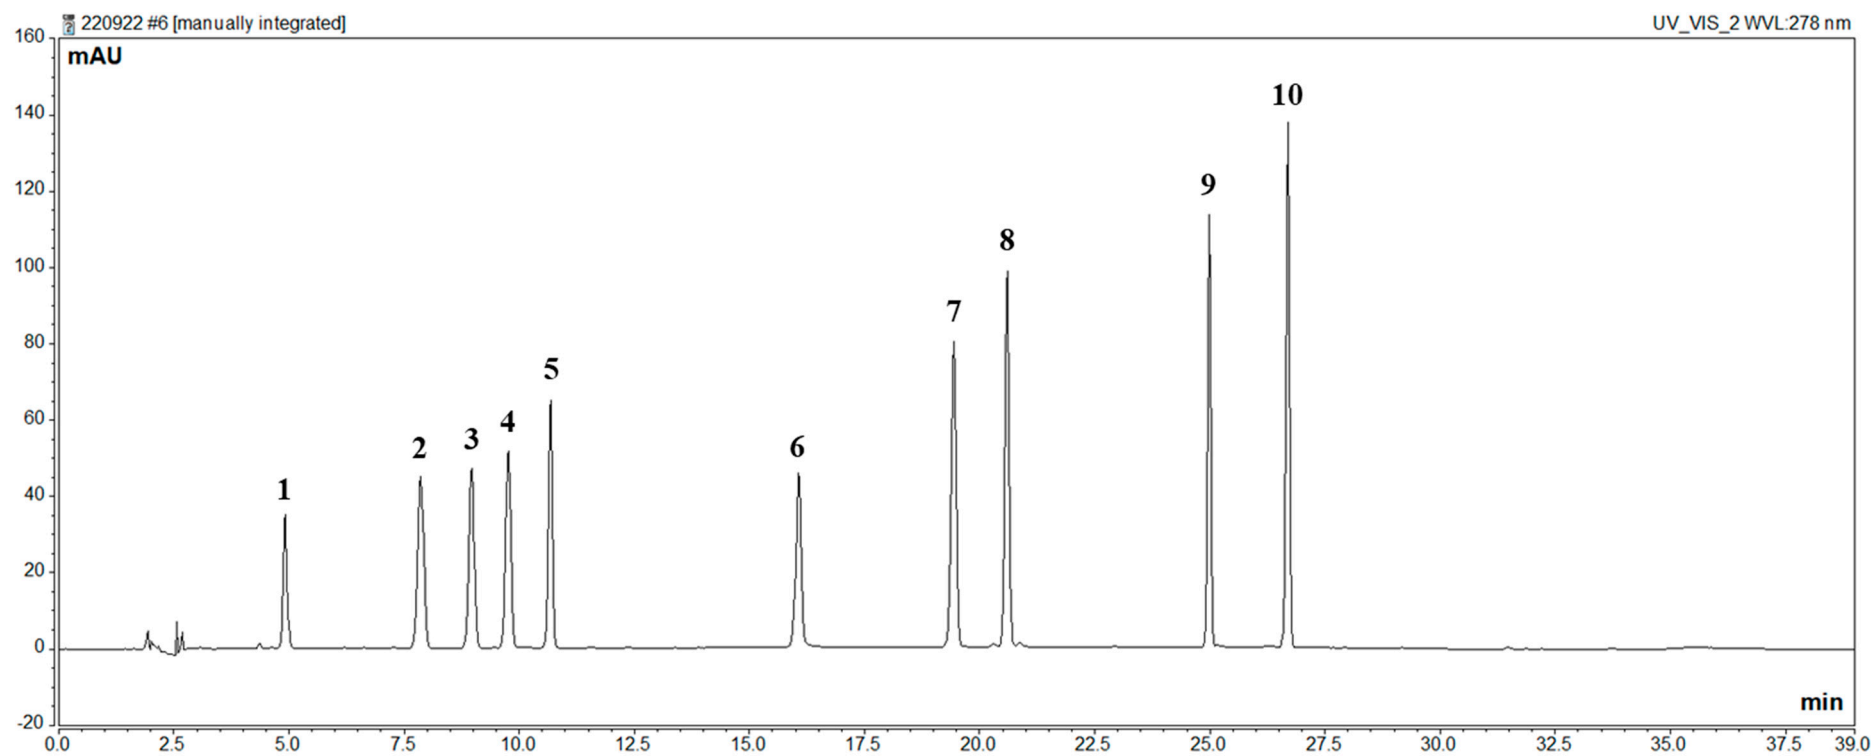

Figure S1. Representative HPLC chromatogram of 10 flavonoid standards. Plot annotation: 1, Rutin; 2, Narirutin; 3, Naringin; 4, Hesperidin; 5, Neohesperidin; 6, Quercetin; 7, Naringenin; 8, Hesperetin; 9, Nobiletin; 10, Tangeretin.

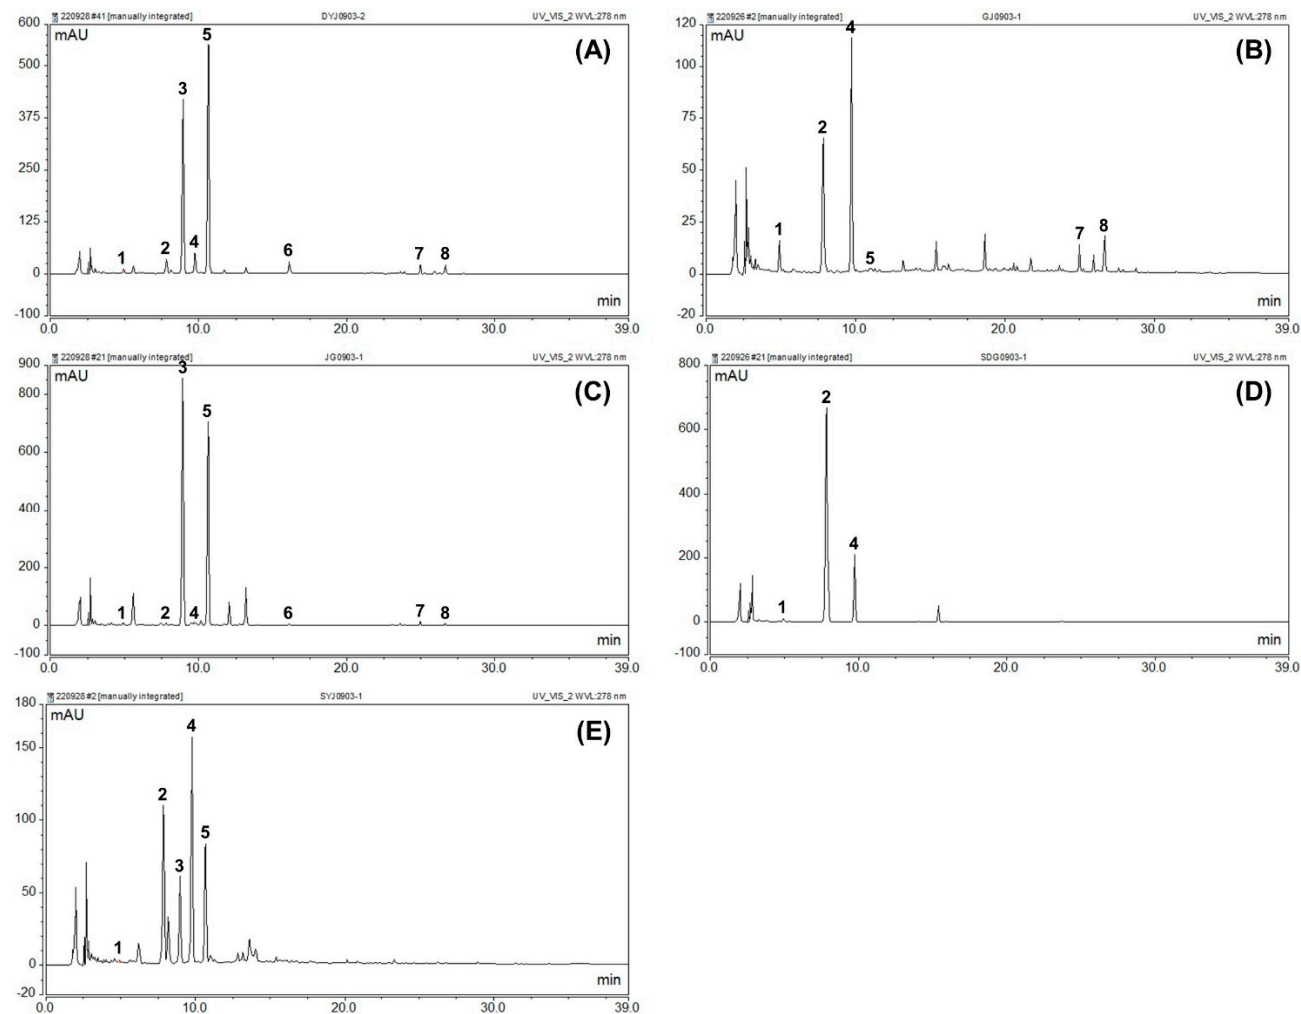

Figure S2. Representative HPLC chromatograms of 70% ethanolic extracts of (A) Dangyuja, (B) Gamja, (C) Jigak, (D) Sadugam, and (E) Soyuja harvested on 3 September. Chromatograms were achieved under optimized HPLC conditions. Plot annotation: 1, Rutin; 2, Narirutin; 3, Naringin; 4, Hesperidin; 5, Neohesperidin; 6, Quercetin; 7, Nobiletin; 8, Tangeretin.
